# Supplementary material for: Sustainability, spread, and scale in trials using audit and feedback: a theory-informed, secondary analysis of a systematic review
Source: Springer Nature journal article supplement (doi:10.1186/s13012-023-01312-0), 2023-10-26
Supplement: MOESM1 [file 26227606]

## Appendix 1: Full list of keywords used for sustainability, spread and scale.

### Sustainability

#### **sustain\***

sustaining  
sustainable  
sustainably  
sustained  
sustainability  
other sustain\*

#### **maintain\***

maintenance  
maintained  
maintaining  
other maintain\*

#### **normal\***

normali#ation  
normali#e  
other normal\*

#### **institutional\***

intitutionali#e  
other institutional\*

#### **integrat\***

integrating  
integration  
integrated  
other integrate\*

#### **embed\***

embedding  
embedded  
other embed\*

#### **durab\***

durability  
durable  
other durability\*

#### **long\***

longitudinal  
other longitudinal\*  
long-term\*  
longer-term\*  
other long-term\*

#### **routin\***

routinized  
routinization  
other routine

#### **standard\***

standardi#e  
standardi#ation  
standardi#ed  
other standard

### Spread/Scale

#### **Scal\***

scales  
scaling  
scaled  
scal\*-up  
up-scale  
up-scaling  
upscaled  
scaling-out  
scalable  
scalability  
at scale  
other scal\*

#### **spread**

spreading  
spreads  
widespread  
other spread\*

#### **roll**

roll out  
rolling out  
rolled out  
other roll\*

#### **reach**

other reach

#### **generali#e\***

generali#ed  
generali#able  
generali#ability  
generali#es  
other generali#e
